# Supplementary material
Source: publisher figshare collection journal article supplement (https://gsapubs.figshare.com/ndownloader/files/39498331)
Supplement: Supplementary file 1 [file 39498331]

| Layer | Age (Ma) | Variability in velocities (%) |
| --- | --- | --- |
| Sea Floor – Top Miocene | 0-6 | 10 |
| Top Miocene – Top Paleogene | 6-23 | 25 |
| Top Paleogene – Top Maastrichian | 23-66 | 25 |
| Top Maastrichtian- Top Santonian | 66-83 | 30 |
| Top Santonian – Top Albian | 83-103 | 30 |
| Top Albian – Top Hauterivian | 103-130 | 25 |
| Top Hauterivian - Top basement  *(unknown volcanic content)* | 130-165 | 50 |

TABLE S2: VARIABILITY OF SEISMIC VELOCITIES
